# Supplementary material for: A Neural Network Model for Estimation of Failure Stresses and Strains in Cohesive Soils
Source: MDPI journal article supplement (doi:10.3390/geotechnics2040051), 2022-12-02
Supplement: s1 [file s1]

## Supplementary Material

The following figures are presented. It is emphasized that is separated from the main manuscript

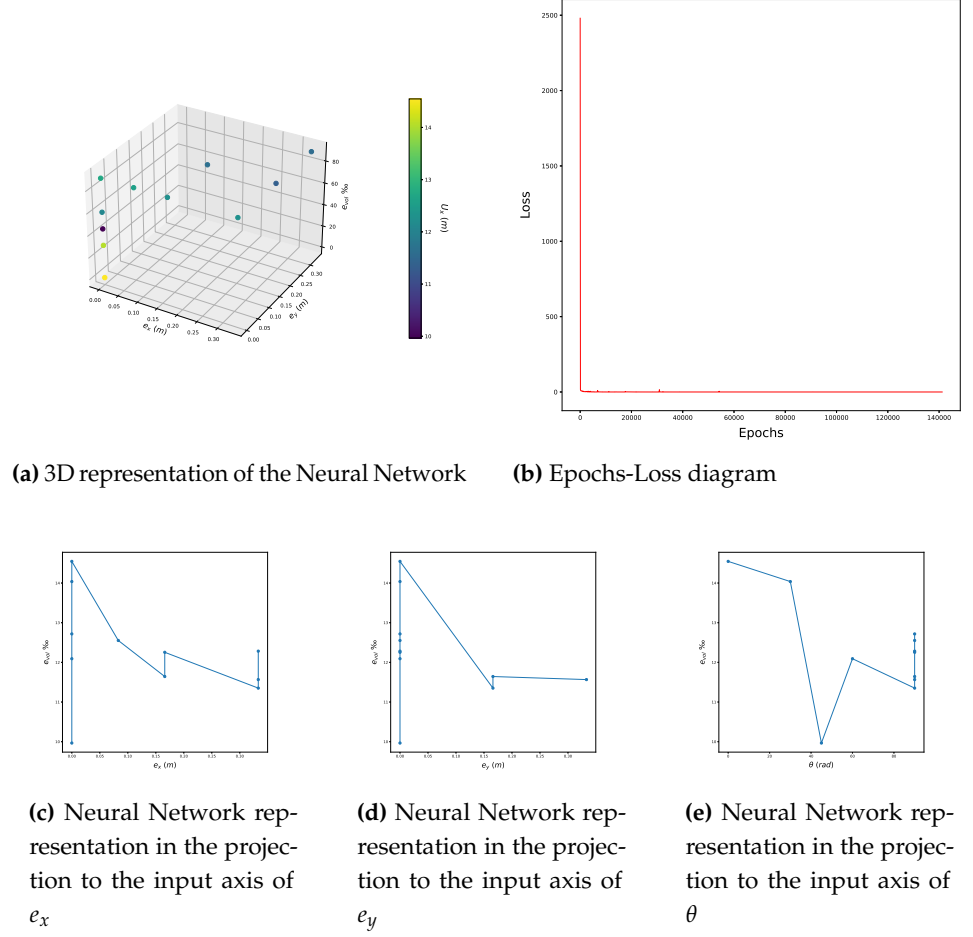

**Figure S1.** Graphical presentation of the Neural Network that corresponds to Monte Carlo analysis  $\mathbf{P}\text{-}\kappa_{RF}\text{-}c_{RF}\text{-}k_{RF-2} - 9$  (NN9) for the estimation of the volumetric component of the strain  $e_{vol}$ .

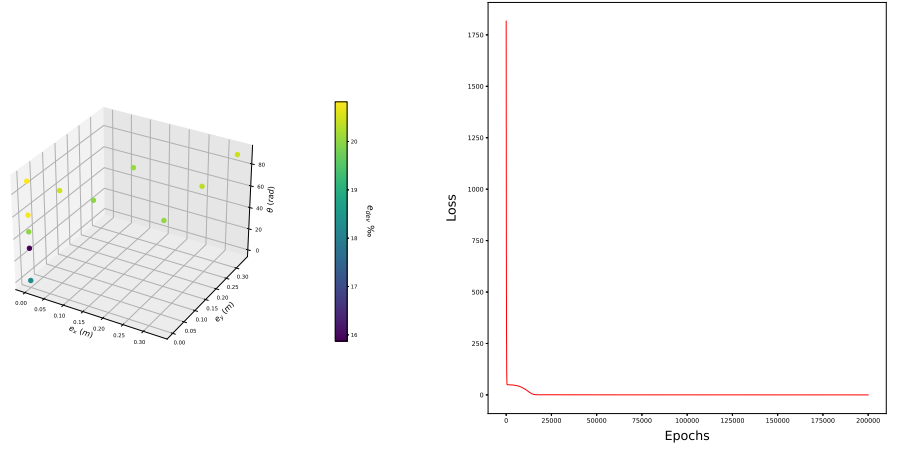

(a) 3D representation of the Neural Network      (b) Epochs-Loss diagram

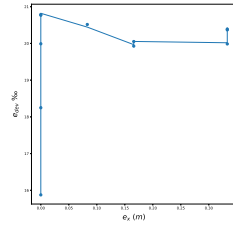

(c) Neural Network representation in the projection to the input axis of  $e_x$

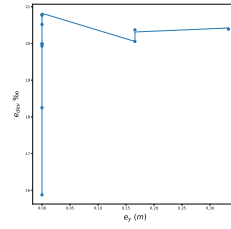

(d) Neural Network representation in the projection to the input axis of  $e_y$

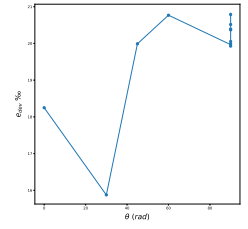

(e) Neural Network representation in the projection to the input axis of  $\theta$

**Figure S2.** Graphical presentation of the Neural Network that corresponds to Monte Carlo analysis  $\mathbf{P}^{-\kappa_{RF}-c_{RF}-k_{RF}-2}-9$  (NN9) for the estimation of the deviatoric component of the strain  $e_{dev}$ .

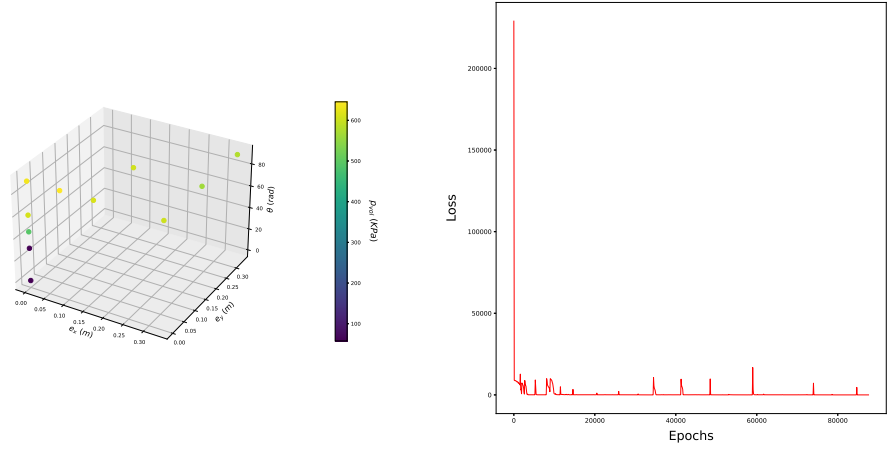

(a) 3D representation of the Neural Network      (b) Epochs-Loss diagram

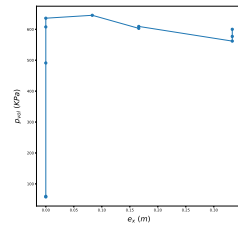

(c) Neural Network representation in the projection to the input axis of  $e_x$

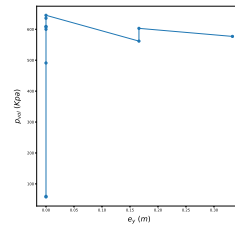

(d) Neural Network representation in the projection to the input axis of  $e_y$

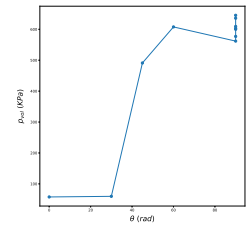

(e) Neural Network representation in the projection to the input axis of  $\theta$

**Figure S3.** Graphical presentation of the Neural Network that corresponds to Monte Carlo analysis  $\mathbf{P}^{\kappa_{RF}-C_{RF}-k_{RF}-4-10}$  (NN10) for the estimation of the volumetric component of the stress  $p_{vol}$  in kPa.

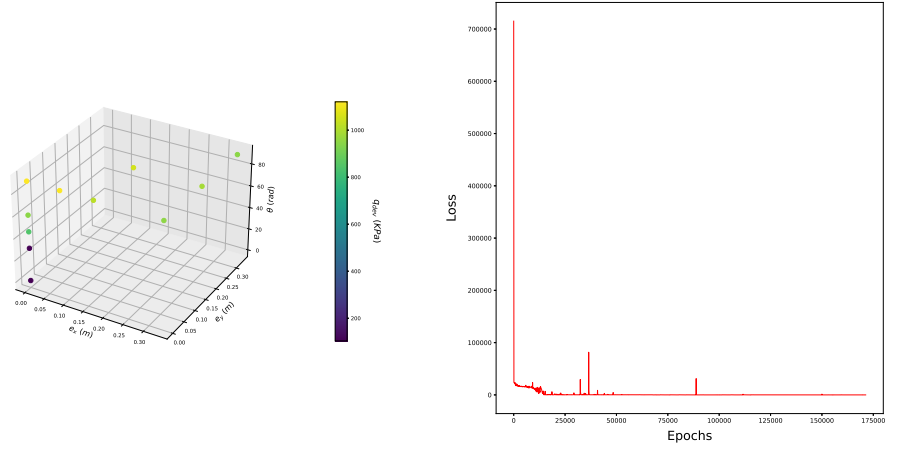

(a) 3D representation of the Neural Network      (b) Epochs-Loss diagram

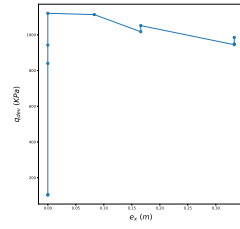

(c) Neural Network representation in the projection to the input axis of  $e_x$

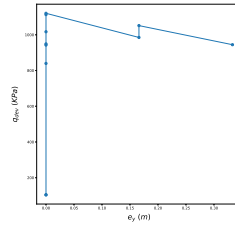

(d) Neural Network representation in the projection to the input axis of  $e_y$

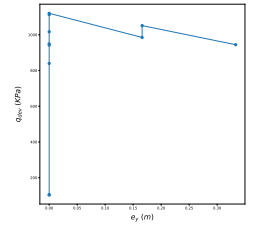

(e) Neural Network representation in the projection to the input axis of  $\theta$

**Figure S4.** Graphical presentation of the Neural Network that corresponds to Monte Carlo analysis  $\mathbf{P}^{-\kappa_{RF}-c_{RF}-k_{RF}-4}-10$  (NN10) for the estimation of the deviatoric component of the stress  $q_{dev}$  in kPa.

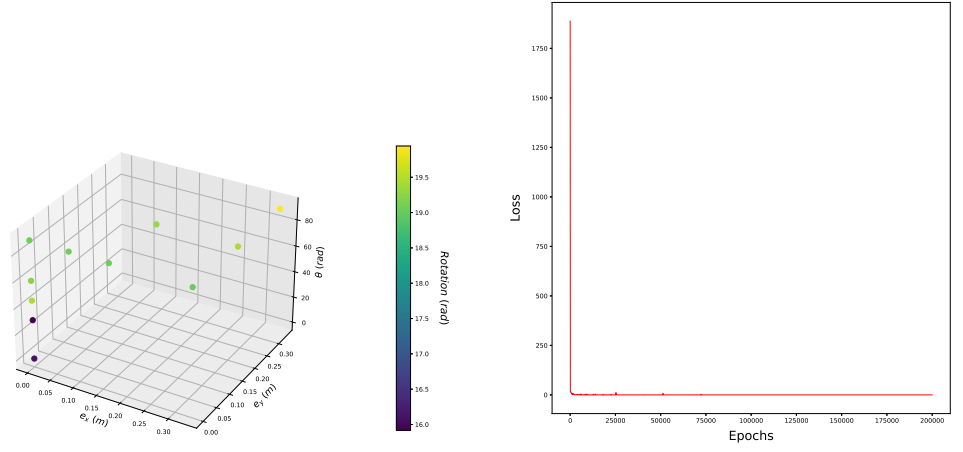

(a) 3D representation of the Neural Network (b) Epochs-Loss diagram

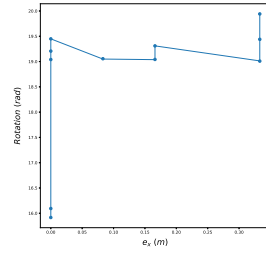

(c) Neural Network representation in the projection to the input axis of  $e_x$

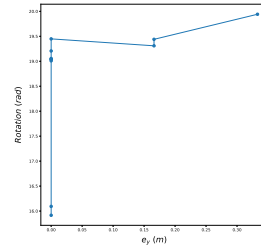

(d) Neural Network representation in the projection to the input axis of  $e_y$

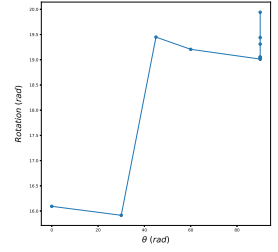

(e) Neural Network representation in the projection to the input axis of  $\theta$

**Figure S5.** Graphical presentation of the Neural Network that corresponds to Monte Carlo analysis  $S-\kappa_L-c_R$ -d3 (NND3) for the estimation of the deviatoric component of the strain  $e_{dev}$ .

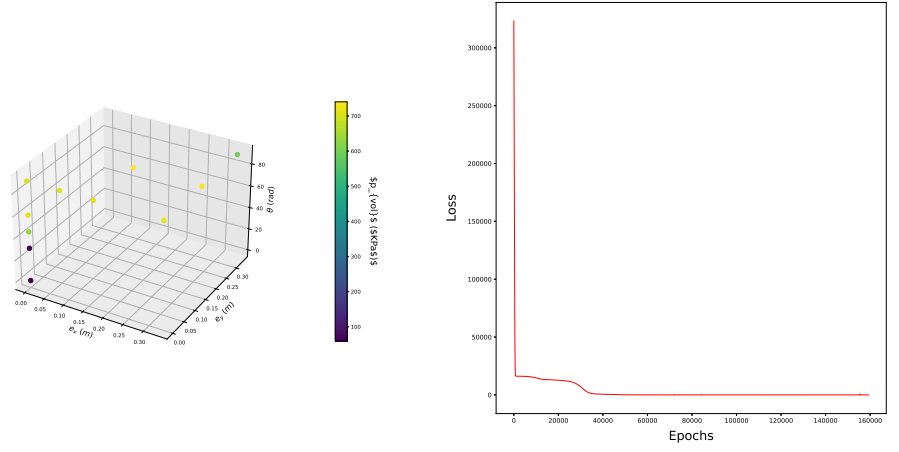

(a) 3D representation of the Neural Network      (b) Epochs-Loss diagram

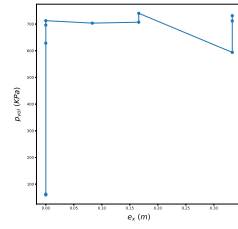

(c) Neural Network representation in the projection to the input axis of  $e_x$

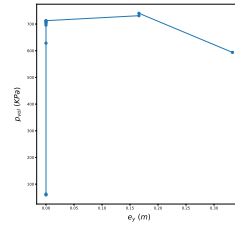

(d) Neural Network representation in the projection to the input axis of  $e_y$

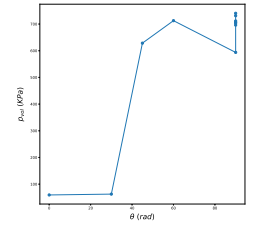

(e) Neural Network representation in the projection to the input axis of  $\theta$

**Figure S6.** Graphical presentation of the Neural Network that corresponds to Monte Carlo analysis  $S-\kappa_L-c_D$ -d4 (NND4) for the estimation of the volumetric component of the stress  $p_{vol}$  in kPa.

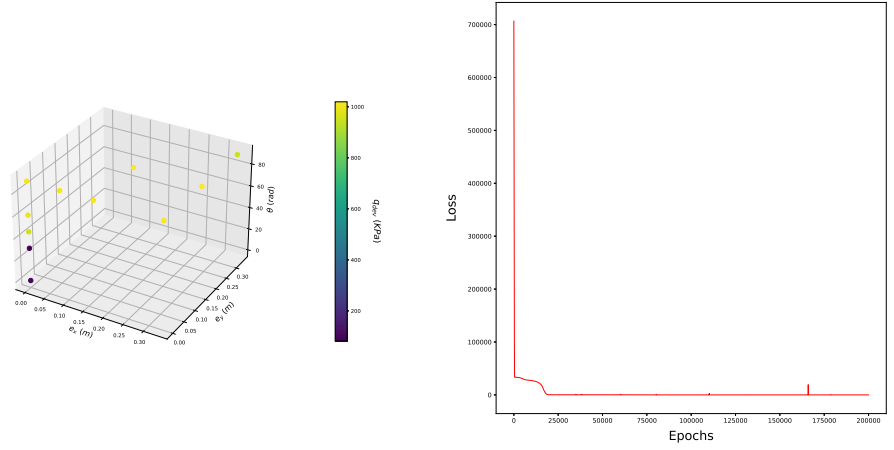

(a) 3D representation of the Neural Network      (b) Epochs-Loss diagram

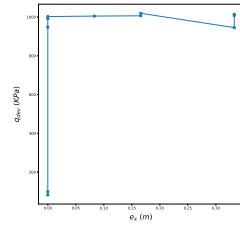

(c) Neural Network representation in the projection to the input axis of  $e_x$

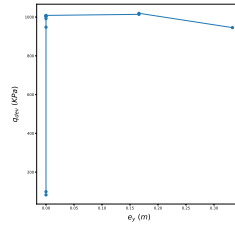

(d) Neural Network representation in the projection to the input axis of  $e_y$

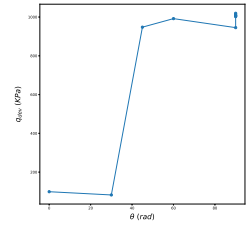

(e) Neural Network representation in the projection to the input axis of  $\theta$

**Figure S7.** Graphical presentation of the Neural Network that corresponds to Monte Carlo analysis  $S-\kappa_L-c_D$ -d4 (NND4) for the estimation of the deviatoric component of the stress  $q_{dev}$  in kPa.

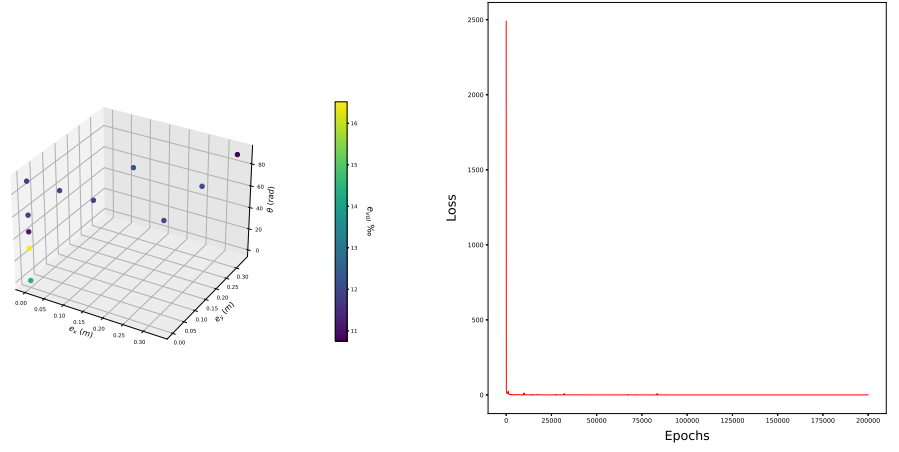

(a) 3D representation of the Neural Network      (b) Epochs-Loss diagram

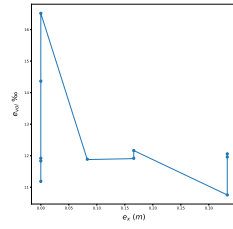

(c) Neural Network representation in the projection to the input axis of  $e_x$

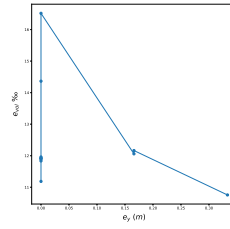

(d) Neural Network representation in the projection to the input axis of  $e_y$

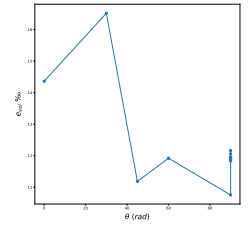

(e) Neural Network representation in the projection to the input axis of  $\theta$

**Figure S8.** Graphical presentation of the Neural Network that corresponds to Monte Carlo analysis  $S-\kappa_L-c_D$ -d4 (NND4) for the estimation of the volumetric component of the strain  $e_{vol}$ .
